# Supplementary material
Source: Research Square preprint supplement (doi:10.21203/rs.3.rs-9653463/v1)
Supplement: Supplementary file 1 [file c1ddaa2bf2b99b6ae6d6a8f9.xlsx]

## Sheet: 新建文本文档
被试ID	性别	年龄	教育水平	婚姻状况	工作年限	OS1	OS2	OS3	OS4	OS5	OS6	JFCS1	JFCS2	TI1	TI2	TI3	TI4	OE1	OE2	OE3	OE4	OE5	OE6	OE7	OE8	OE9	OE10	OE11	OE12	OE13	OE14
1	女	26	大专	未婚	2年	3	3	2	4	3	2	4	3	4	5	4	4	4	3	4	5	3	4	3	4	4	3	5	4	3	4
2	女	35	本科	已婚	7年	4	3	4	3	4	3	4	4	5	4	5	4	3	4	3	4	4	3	4	3	3	4	4	3	4	3
3	男	32	本科	已婚	5年	3	2	3	2	3	2	3	3	4	3	4	3	4	5	4	3	5	4	5	4	4	5	4	5	4	5
4	女	25	大专	未婚	1年	4	4	3	5	4	3	5	4	5	5	4	5	3	3	4	3	3	4	3	3	3	3	3	4	3	3
5	女	38	本科	已婚	9年	3	3	4	3	3	4	4	5	4	4	5	4	4	4	3	4	4	3	4	4	4	4	3	4	3	4
6	男	45	本科	已婚	12年	2	3	2	3	2	3	3	3	3	4	3	4	5	4	5	4	4	5	4	5	4	5	5	4	5	4
7	女	29	大专	未婚	3年	3	4	3	4	3	3	4	4	4	5	4	5	3	4	3	3	4	3	4	3	3	4	3	4	3	3
8	女	33	高中	已婚	6年	4	3	5	4	3	4	5	5	5	4	5	5	2	3	3	2	3	3	2	3	2	3	2	3	2	3
9	男	27	本科	未婚	2年	2	2	3	2	3	2	3	2	3	3	4	3	4	4	5	4	5	4	5	4	5	4	5	5	4	5
10	女	36	硕士	已婚	8年	3	3	3	3	4	3	4	3	4	4	4	4	4	5	4	5	4	5	4	5	4	5	4	5	4	5
11	女	28	本科	未婚	2年	3	2	3	4	2	3	4	3	4	4	3	4	4	3	5	4	3	4	3	4	3	5	4	3	4	3
12	女	34	大专	已婚	6年	3	3	3	3	3	3	4	4	4	4	4	4	3	4	4	3	4	3	4	3	4	3	4	4	3	4
13	男	31	大专	未婚	4年	3	2	2	3	3	2	3	2	4	3	3	4	4	3	4	3	4	3	3	4	3	4	3	4	3	4
14	女	24	高中	未婚	1年	4	3	4	4	3	4	5	3	5	4	5	4	2	4	3	2	3	4	2	3	2	3	4	2	3	2
15	女	40	本科	已婚	10年	3	3	3	4	3	3	4	4	4	3	4	3	4	4	4	4	4	4	4	4	4	4	4	4	4	4
16	男	48	大专	已婚	15年	2	2	2	3	2	2	3	2	3	2	3	2	5	3	5	3	5	3	5	3	5	3	5	3	5	3
17	女	26	大专	未婚	1年	4	3	4	3	4	3	4	4	5	4	4	5	3	4	3	4	3	4	3	4	3	4	3	4	3	4
18	女	32	本科	已婚	5年	3	4	3	3	4	3	4	4	4	5	3	5	4	3	4	3	4	3	4	3	4	3	4	3	4	3
19	男	30	本科	未婚	3年	3	3	2	4	3	2	3	3	4	4	3	4	4	5	3	5	4	5	3	5	4	5	3	5	4	5
20	女	37	本科	已婚	8年	3	3	3	3	3	3	4	5	4	4	4	4	4	4	4	4	4	4	4	4	4	4	4	4	4	4
21	女	29	高中	未婚	2年	4	4	3	4	4	3	5	4	5	5	4	5	3	3	3	3	3	3	3	3	3	3	3	3	3	3
22	女	35	大专	已婚	7年	3	3	4	3	3	4	4	4	4	4	5	4	3	4	4	3	4	4	3	4	4	3	4	4	3	4
23	男	42	本科	已婚	11年	2	3	2	2	3	2	3	3	3	3	3	3	5	4	4	5	4	4	5	4	4	5	4	4	5	4
24	女	25	本科	未婚	1年	4	3	4	5	3	4	5	3	5	4	5	3	3	4	3	3	4	3	3	4	3	3	4	3	3	4
25	女	39	硕士	已婚	9年	3	4	3	3	4	3	4	4	4	5	4	5	4	5	4	5	4	5	4	5	4	5	4	5	4	5
26	男	33	大专	未婚	5年	3	2	3	3	2	3	3	2	4	3	4	3	4	3	4	3	4	3	4	3	4	3	4	3	4	3
27	女	28	大专	未婚	2年	3	3	3	4	3	3	4	3	4	4	4	4	3	4	3	4	3	4	3	4	3	4	3	4	3	4
28	女	34	本科	已婚	6年	4	3	4	3	4	3	4	4	5	4	5	4	4	3	4	3	4	3	4	3	4	3	4	3	4	3
29	男	46	高中	已婚	13年	2	2	3	2	2	3	3	2	3	2	3	2	5	3	5	3	5	3	5	3	5	3	5	3	5	3
30	女	25	本科	未婚	1年	3	4	2	4	3	2	4	3	4	5	3	5	3	3	4	2	3	4	2	3	2	3	4	2	3	2
31	女	31	大专	已婚	4年	3	3	4	3	3	4	4	5	4	4	5	4	4	4	3	4	4	3	4	4	4	4	3	4	3	4
32	女	37	本科	已婚	8年	3	2	3	4	2	3	4	3	4	4	3	4	4	5	4	3	5	4	3	5	4	5	4	3	5	4
33	男	29	本科	未婚	2年	2	3	2	3	3	2	3	3	3	4	3	4	4	4	5	4	4	5	4	4	5	4	4	5	4	4
34	女	26	大专	未婚	1年	4	3	4	4	3	4	5	4	5	4	5	4	3	4	3	3	4	3	4	3	3	4	3	4	3	3
35	女	35	高中	已婚	7年	3	4	3	3	4	3	4	4	4	5	4	5	3	4	4	3	4	4	3	4	4	3	4	4	3	4
36	男	43	本科	已婚	11年	2	2	2	3	2	2	3	2	3	2	3	2	5	4	5	4	5	4	5	4	5	4	5	4	5	4
37	女	28	本科	未婚	2年	3	3	3	4	3	3	4	3	4	4	4	4	4	3	4	3	4	3	4	3	4	3	4	3	4	3
38	女	33	大专	已婚	6年	4	3	5	4	3	4	5	5	5	4	5	5	3	3	4	3	3	4	3	3	3	3	4	3	3	4
39	男	30	本科	未婚	3年	3	2	3	2	3	2	3	2	3	3	4	3	4	5	4	5	4	5	4	5	4	5	4	5	4	5
40	女	39	硕士	已婚	9年	3	3	3	3	4	3	4	3	4	4	4	4	4	5	4	5	4	5	4	5	4	5	4	5	4	5
41	女	27	大专	未婚	1年	4	4	3	5	4	3	5	4	5	5	4	5	3	3	4	3	3	4	3	3	3	3	3	4	3	3
42	女	34	本科	已婚	6年	3	3	4	3	3	4	4	5	4	4	5	4	4	4	3	4	4	3	4	4	4	4	3	4	3	4
43	男	44	本科	已婚	12年	2	3	2	3	2	3	3	3	3	4	3	4	5	4	5	4	4	5	4	5	4	5	5	4	5	4
44	女	25	大专	未婚	1年	4	3	4	4	3	4	5	4	5	4	5	4	3	3	4	3	3	4	3	3	3	3	4	3	3	4
45	女	38	本科	已婚	8年	3	3	3	3	4	3	4	3	4	4	4	4	4	4	4	4	4	4	4	4	4	4	4	4	4	4
46	男	28	本科	未婚	2年	3	2	3	2	3	2	3	2	3	3	4	3	4	4	5	4	5	4	5	4	5	4	5	4	5	4
47	女	32	大专	已婚	5年	3	4	3	4	3	3	4	4	4	5	4	5	3	4	3	3	4	3	4	3	3	4	3	4	3	3
48	女	36	本科	已婚	8年	3	3	3	3	4	3	4	3	4	4	4	4	4	5	4	5	4	5	4	5	4	5	4	5	4	5
49	男	47	高中	已婚	14年	2	2	3	2	2	3	3	2	3	2	3	2	5	3	5	3	5	3	5	3	5	3	5	3	5	3
50	女	26	大专	未婚	2年	3	3	2	4	3	2	4	3	4	5	4	4	4	3	4	5	3	4	3	4	4	3	5	4	3	4
51	女	35	本科	已婚	7年	4	3	4	3	4	3	4	4	5	4	5	4	3	4	3	4	4	3	4	3	3	4	4	3	4	3
52	男	32	本科	已婚	5年	3	2	3	2	3	2	3	3	4	3	4	3	4	5	4	3	5	4	5	4	4	5	4	5	4	5
53	女	25	大专	未婚	1年	4	4	3	5	4	3	5	4	5	5	4	5	3	3	4	3	3	4	3	3	3	3	3	4	3	3
54	女	38	本科	已婚	9年	3	3	4	3	3	4	4	5	4	4	5	4	4	4	3	4	4	3	4	4	4	4	3	4	3	4
55	男	45	本科	已婚	12年	2	3	2	3	2	3	3	3	3	4	3	4	5	4	5	4	4	5	4	5	4	5	5	4	5	4
56	女	29	大专	未婚	3年	3	4	3	4	3	3	4	4	4	5	4	5	3	4	3	3	4	3	4	3	3	4	3	4	3	3
57	女	33	高中	已婚	6年	4	3	5	4	3	4	5	5	5	4	5	5	2	3	3	2	3	3	2	3	2	3	2	3	2	3
58	男	27	本科	未婚	2年	2	2	3	2	3	2	3	2	3	3	4	3	4	4	5	4	5	4	5	4	5	4	5	5	4	5
59	女	36	硕士	已婚	8年	3	3	3	3	4	3	4	3	4	4	4	4	4	5	4	5	4	5	4	5	4	5	4	5	4	5
60	女	28	本科	未婚	2年	3	2	3	4	2	3	4	3	4	4	3	4	4	3	5	4	3	4	3	4	3	5	4	3	4	3
61	女	34	大专	已婚	6年	3	3	3	3	3	3	4	4	4	4	4	4	3	4	4	3	4	3	4	3	4	3	4	4	3	4
62	男	31	大专	未婚	4年	3	2	2	3	3	2	3	2	4	3	3	4	4	3	4	3	4	3	3	4	3	4	3	4	3	4
63	女	24	高中	未婚	1年	4	3	4	4	3	4	5	3	5	4	5	4	2	4	3	2	3	4	2	3	2	3	4	2	3	2
64	女	40	本科	已婚	10年	3	3	3	4	3	3	4	4	4	3	4	3	4	4	4	4	4	4	4	4	4	4	4	4	4	4
65	男	48	大专	已婚	15年	2	2	2	3	2	2	3	2	3	2	3	2	5	3	5	3	5	3	5	3	5	3	5	3	5	3
66	女	26	大专	未婚	1年	4	3	4	3	4	3	4	4	5	4	4	5	3	4	3	4	3	4	3	4	3	4	3	4	3	4
67	女	32	本科	已婚	5年	3	4	3	3	4	3	4	4	4	5	3	5	4	3	4	3	4	3	4	3	4	3	4	3	4	3
68	男	30	本科	未婚	3年	3	3	2	4	3	2	3	3	4	4	3	4	4	5	3	5	4	5	3	5	4	5	3	5	4	5
69	女	37	本科	已婚	8年	3	3	3	3	3	3	4	5	4	4	4	4	4	4	4	4	4	4	4	4	4	4	4	4	4	4
70	女	29	高中	未婚	2年	4	4	3	4	4	3	5	4	5	5	4	5	3	3	3	3	3	3	3	3	3	3	3	3	3	3
71	女	35	大专	已婚	7年	3	3	4	3	3	4	4	4	4	4	5	4	3	4	4	3	4	4	3	4	4	3	4	4	3	4
72	男	42	本科	已婚	11年	2	3	2	2	3	2	3	3	3	3	3	3	5	4	4	5	4	4	5	4	4	5	4	4	5	4
73	女	25	本科	未婚	1年	4	3	4	5	3	4	5	3	5	4	5	3	3	4	3	3	4	3	3	4	3	3	4	3	3	4
74	女	39	硕士	已婚	9年	3	4	3	3	4	3	4	4	4	5	4	5	4	5	4	5	4	5	4	5	4	5	4	5	4	5
75	男	33	大专	未婚	5年	3	2	3	3	2	3	3	2	4	3	4	3	4	3	4	3	4	3	4	3	4	3	4	3	4	3
76	女	28	大专	未婚	2年	3	3	3	4	3	3	4	3	4	4	4	4	3	4	3	4	3	4	3	4	3	4	3	4	3	4
77	女	34	本科	已婚	6年	4	3	4	3	4	3	4	4	5	4	5	4	4	3	4	3	4	3	4	3	4	3	4	3	4	3
78	男	46	高中	已婚	13年	2	2	3	2	2	3	3	2	3	2	3	2	5	3	5	3	5	3	5	3	5	3	5	3	5	3
79	女	25	本科	未婚	1年	3	4	2	4	3	2	4	3	4	5	3	5	3	3	4	2	3	4	2	3	2	3	4	2	3	2
80	女	31	大专	已婚	4年	3	3	4	3	3	4	4	5	4	4	5	4	4	4	3	4	4	3	4	4	4	4	3	4	3	4
81	男	29	本科	未婚	2年	3	2	3	4	2	3	4	3	4	4	3	4	4	5	4	3	5	4	3	5	4	5	4	3	5	4
82	女	26	大专	未婚	1年	4	3	4	4	3	4	5	4	5	4	5	4	3	3	4	3	3	4	3	3	3	3	4	3	3	4
83	女	35	本科	已婚	7年	3	3	3	3	4	3	4	3	4	4	4	4	4	4	4	4	4	4	4	4	4	4	4	4	4	4
84	男	43	本科	已婚	11年	2	3	2	3	2	3	3	3	3	4	3	4	5	4	5	4	4	5	4	5	4	5	5	4	5	4
85	女	28	本科	未婚	2年	3	2	3	2	3	2	3	2	3	3	4	3	4	4	5	4	5	4	5	4	5	4	5	4	5	4
86	女	33	大专	已婚	6年	3	4	3	4	3	3	4	4	4	5	4	5	3	4	3	3	4	3	4	3	3	4	3	4	3	3
87	男	30	本科	未婚	3年	3	3	2	4	3	2	3	3	4	4	3	4	4	5	3	5	4	5	3	5	4	5	3	5	4	5
88	女	37	硕士	已婚	8年	3	3	3	3	4	3	4	3	4	4	4	4	4	5	4	5	4	5	4	5	4	5	4	5	4	5
89	女	27	大专	未婚	1年	4	4	3	5	4	3	5	4	5	5	4	5	3	3	4	3	3	4	3	3	3	3	3	4	3	3
90	女	34	本科	已婚	6年	3	3	4	3	3	4	4	5	4	4	5	4	4	4	3	4	4	3	4	4	4	4	3	4	3	4
91	男	44	本科	已婚	12年	2	3	2	3	2	3	3	3	3	4	3	4	5	4	5	4	4	5	4	5	4	5	5	4	5	4
92	女	25	大专	未婚	1年	4	3	4	4	3	4	5	4	5	4	5	4	3	3	4	3	3	4	3	3	3	3	4	3	3	4
93	女	38	本科	已婚	8年	3	3	3	3	4	3	4	3	4	4	4	4	4	4	4	4	4	4	4	4	4	4	4	4	4	4
94	男	28	本科	未婚	2年	3	2	3	2	3	2	3	2	3	3	4	3	4	4	5	4	5	4	5	4	5	4	5	4	5	4
95	女	32	大专	已婚	5年	3	4	3	4	3	3	4	4	4	5	4	5	3	4	3	3	4	3	4	3	3	4	3	4	3	3
96	女	36	本科	已婚	8年	3	3	3	3	4	3	4	3	4	4	4	4	4	5	4	5	4	5	4	5	4	5	4	5	4	5
97	男	47	高中	已婚	14年	2	2	3	2	2	3	3	2	3	2	3	2	5	3	5	3	5	3	5	3	5	3	5	3	5	3
98	女	26	大专	未婚	2年	3	3	2	4	3	2	4	3	4	5	4	4	4	3	4	5	3	4	3	4	4	3	5	4	3	4
99	女	35	本科	已婚	7年	4	3	4	3	4	3	4	4	5	4	5	4	3	4	3	4	4	3	4	3	3	4	4	3	4	3
100	男	32	本科	已婚	5年	3	2	3	2	3	2	3	3	4	3	4	3	4	5	4	3	5	4	5	4	4	5	4	5	4	5
101	女	25	大专	未婚	1年	4	4	3	5	4	3	5	4	5	5	4	5	3	3	4	3	3	4	3	3	3	3	3	4	3	3
102	女	38	本科	已婚	9年	3	3	4	3	3	4	4	5	4	4	5	4	4	4	3	4	4	3	4	4	4	4	3	4	3	4
103	男	45	本科	已婚	12年	2	3	2	3	2	3	3	3	3	4	3	4	5	4	5	4	4	5	4	5	4	5	5	4	5	4
104	女	29	大专	未婚	3年	3	4	3	4	3	3	4	4	4	5	4	5	3	4	3	3	4	3	4	3	3	4	3	4	3	3
105	女	33	高中	已婚	6年	4	3	5	4	3	4	5	5	5	4	5	5	2	3	3	2	3	3	2	3	2	3	2	3	2	3
106	男	27	本科	未婚	2年	2	2	3	2	3	2	3	2	3	3	4	3	4	4	5	4	5	4	5	4	5	4	5	5	4	5
107	女	36	硕士	已婚	8年	3	3	3	3	4	3	4	3	4	4	4	4	4	5	4	5	4	5	4	5	4	5	4	5	4	5
108	女	28	本科	未婚	2年	3	2	3	4	2	3	4	3	4	4	3	4	4	3	5	4	3	4	3	4	3	5	4	3	4	3
109	女	34	大专	已婚	6年	3	3	3	3	3	3	4	4	4	4	4	4	3	4	4	3	4	3	4	3	4	3	4	4	3	4
110	男	31	大专	未婚	4年	3	2	2	3	3	2	3	2	4	3	3	4	4	3	4	3	4	3	3	4	3	4	3	4	3	4
111	女	24	高中	未婚	1年	4	3	4	4	3	4	5	3	5	4	5	4	2	4	3	2	3	4	2	3	2	3	4	2	3	2
112	女	40	本科	已婚	10年	3	3	3	4	3	3	4	4	4	3	4	3	4	4	4	4	4	4	4	4	4	4	4	4	4	4
113	男	48	大专	已婚	15年	2	2	2	3	2	2	3	2	3	2	3	2	5	3	5	3	5	3	5	3	5	3	5	3	5	3
114	女	26	大专	未婚	1年	4	3	4	3	4	3	4	4	5	4	4	5	3	4	3	4	3	4	3	4	3	4	3	4	3	4
115	女	32	本科	已婚	5年	3	4	3	3	4	3	4	4	4	5	3	5	4	3	4	3	4	3	4	3	4	3	4	3	4	3
116	男	30	本科	未婚	3年	3	3	2	4	3	2	3	3	4	4	3	4	4	5	3	5	4	5	3	5	4	5	3	5	4	5
117	女	37	本科	已婚	8年	3	3	3	3	3	3	4	5	4	4	4	4	4	4	4	4	4	4	4	4	4	4	4	4	4	4
118	女	29	高中	未婚	2年	4	4	3	4	4	3	5	4	5	5	4	5	3	3	3	3	3	3	3	3	3	3	3	3	3	3
119	女	35	大专	已婚	7年	3	3	4	3	3	4	4	4	4	4	5	4	3	4	4	3	4	4	3	4	4	3	4	4	3	4
120	男	42	本科	已婚	11年	2	3	2	2	3	2	3	3	3	3	3	3	5	4	4	5	4	4	5	4	4	5	4	4	5	4
121	女	25	本科	未婚	1年	4	3	4	5	3	4	5	3	5	4	5	3	3	4	3	3	4	3	3	4	3	3	4	3	3	4
122	女	39	硕士	已婚	9年	3	4	3	3	4	3	4	4	4	5	4	5	4	5	4	5	4	5	4	5	4	5	4	5	4	5
123	男	33	大专	未婚	5年	3	2	3	3	2	3	3	2	4	3	4	3	4	3	4	3	4	3	4	3	4	3	4	3	4	3
124	女	28	大专	未婚	2年	3	3	3	4	3	3	4	3	4	4	4	4	3	4	3	4	3	4	3	4	3	4	3	4	3	4
125	女	34	本科	已婚	6年	4	3	4	3	4	3	4	4	5	4	5	4	4	3	4	3	4	3	4	3	4	3	4	3	4	3
126	男	46	高中	已婚	13年	2	2	3	2	2	3	3	2	3	2	3	2	5	3	5	3	5	3	5	3	5	3	5	3	5	3
127	女	25	本科	未婚	1年	3	4	2	4	3	2	4	3	4	5	3	5	3	3	4	2	3	4	2	3	2	3	4	2	3	2
128	女	31	大专	已婚	4年	3	3	4	3	3	4	4	5	4	4	5	4	4	4	3	4	4	3	4	4	4	4	3	4	3	4
129	男	29	本科	未婚	2年	3	2	3	4	2	3	4	3	4	4	3	4	4	5	4	3	5	4	3	5	4	5	4	3	5	4
130	女	26	大专	未婚	1年	4	3	4	4	3	4	5	4	5	4	5	4	3	3	4	3	3	4	3	3	3	3	4	3	3	4
131	女	35	本科	已婚	7年	3	3	3	3	4	3	4	3	4	4	4	4	4	4	4	4	4	4	4	4	4	4	4	4	4	4
132	男	43	本科	已婚	11年	2	3	2	3	2	3	3	3	3	4	3	4	5	4	5	4	4	5	4	5	4	5	5	4	5	4
133	女	28	本科	未婚	2年	3	2	3	2	3	2	3	2	3	3	4	3	4	4	5	4	5	4	5	4	5	4	5	4	5	4
134	女	33	大专	已婚	6年	3	4	3	4	3	3	4	4	4	5	4	5	3	4	3	3	4	3	4	3	3	4	3	4	3	3
135	男	30	本科	未婚	3年	3	3	2	4	3	2	3	3	4	4	3	4	4	5	3	5	4	5	3	5	4	5	3	5	4	5
136	女	37	硕士	已婚	8年	3	3	3	3	4	3	4	3	4	4	4	4	4	5	4	5	4	5	4	5	4	5	4	5	4	5
137	男	45	本科	已婚	12年	2	3	2	3	2	3	3	3	3	4	3	4	5	4	5	4	4	5	4	5	4	5	5	4	5	4
138	女	25	大专	未婚	1年	4	4	3	5	4	3	5	4	5	5	4	5	3	3	4	3	3	4	3	3	3	3	3	4	3	3
139	女	38	本科	已婚	9年	3	3	4	3	3	4	4	5	4	4	5	4	4	4	3	4	4	3	4	4	4	4	3	4	3	4
140	女	29	大专	未婚	3年	3	4	3	4	3	3	4	4	4	5	4	5	3	4	3	3	4	3	4	3	3	4	3	4	3	3
141	女	33	高中	已婚	6年	4	3	5	4	3	4	5	5	5	4	5	5	2	3	3	2	3	3	2	3	2	3	2	3	2	3
142	女	27	本科	未婚	2年	2	2	3	2	3	2	3	2	3	3	4	3	4	4	5	4	5	4	5	4	5	4	5	5	4	5
143	女	36	硕士	已婚	8年	3	3	3	3	4	3	4	3	4	4	4	4	4	5	4	5	4	5	4	5	4	5	4	5	4	5
144	女	28	本科	未婚	2年	3	2	3	4	2	3	4	3	4	4	3	4	4	3	5	4	3	4	3	4	3	5	4	3	4	3
145	女	34	大专	已婚	6年	3	3	3	3	3	3	4	4	4	4	4	4	3	4	4	3	4	3	4	3	4	3	4	4	3	4
146	女	24	高中	未婚	1年	4	3	4	4	3	4	5	3	5	4	5	4	2	4	3	2	3	4	2	3	2	3	4	2	3	2
147	女	40	本科	已婚	10年	3	3	3	4	3	3	4	4	4	3	4	3	4	4	4	4	4	4	4	4	4	4	4	4	4	4
148	女	26	大专	未婚	1年	4	3	4	3	4	3	4	4	5	4	4	5	3	4	3	4	3	4	3	4	3	4	3	4	3	4
149	女	32	本科	已婚	5年	3	4	3	3	4	3	4	4	4	5	3	5	4	3	4	3	4	3	4	3	4	3	4	3	4	3
150	女	30	本科	未婚	3年	3	3	2	4	3	2	3	3	4	4	3	4	4	5	3	5	4	5	3	5	4	5	3	5	4	5
151	女	37	本科	已婚	8年	3	3	3	3	3	3	4	5	4	4	4	4	4	4	4	4	4	4	4	4	4	4	4	4	4	4
152	女	29	高中	未婚	2年	4	4	3	4	4	3	5	4	5	5	4	5	3	3	3	3	3	3	3	3	3	3	3	3	3	3
153	女	35	大专	已婚	7年	3	3	4	3	3	4	4	4	4	4	5	4	3	4	4	3	4	4	3	4	4	3	4	4	3	4
154	女	25	本科	未婚	1年	4	3	4	5	3	4	5	3	5	4	5	3	3	4	3	3	4	3	3	4	3	3	4	3	3	4
155	女	39	硕士	已婚	9年	3	4	3	3	4	3	4	4	4	5	4	5	4	5	4	5	4	5	4	5	4	5	4	5	4	5
156	女	33	大专	未婚	5年	3	2	3	3	2	3	3	2	4	3	4	3	4	3	4	3	4	3	4	3	4	3	4	3	4	3
157	女	28	大专	未婚	2年	3	3	3	4	3	3	4	3	4	4	4	4	3	4	3	4	3	4	3	4	3	4	3	4	3	4
158	女	34	本科	已婚	6年	4	3	4	3	4	3	4	4	5	4	5	4	4	3	4	3	4	3	4	3	4	3	4	3	4	3
159	女	25	本科	未婚	1年	3	4	2	4	3	2	4	3	4	5	3	5	3	3	4	2	3	4	2	3	2	3	4	2	3	2
160	女	31	大专	已婚	4年	3	3	4	3	3	4	4	5	4	4	5	4	4	4	3	4	4	3	4	4	4	4	3	4	3	4
161	女	29	本科	未婚	2年	3	2	3	4	2	3	4	3	4	4	3	4	4	5	4	3	5	4	3	5	4	5	4	3	5	4
162	女	26	大专	未婚	1年	4	3	4	4	3	4	5	4	5	4	5	4	3	3	4	3	3	4	3	3	3	3	4	3	3	4
163	女	35	本科	已婚	7年	3	3	3	3	4	3	4	3	4	4	4	4	4	4	4	4	4	4	4	4	4	4	4	4	4	4
164	女	43	本科	已婚	11年	2	3	2	3	2	3	3	3	3	4	3	4	5	4	5	4	4	5	4	5	4	5	5	4	5	4
165	女	28	本科	未婚	2年	3	2	3	2	3	2	3	2	3	3	4	3	4	4	5	4	5	4	5	4	5	4	5	4	5	4
166	女	33	大专	已婚	6年	3	4	3	4	3	3	4	4	4	5	4	5	3	4	3	3	4	3	4	3	3	4	3	4	3	3
167	女	30	本科	未婚	3年	3	3	2	4	3	2	3	3	4	4	3	4	4	5	3	5	4	5	3	5	4	5	3	5	4	5
168	女	37	硕士	已婚	8年	3	3	3	3	4	3	4	3	4	4	4	4	4	5	4	5	4	5	4	5	4	5	4	5	4	5
169	女	47	高中	已婚	14年	2	2	3	2	2	3	3	2	3	2	3	2	5	3	5	3	5	3	5	3	5	3	5	3	5	3
170	女	26	大专	未婚	2年	3	3	2	4	3	2	4	3	4	5	4	4	4	3	4	5	3	4	3	4	4	3	5	4	3	4
171	女	35	本科	已婚	7年	4	3	4	3	4	3	4	4	5	4	5	4	3	4	3	4	4	3	4	3	3	4	4	3	4	3
172	女	32	本科	已婚	5年	3	2	3	2	3	2	3	3	4	3	4	3	4	5	4	3	5	4	5	4	4	5	4	5	4	5
173	女	25	大专	未婚	1年	4	4	3	5	4	3	5	4	5	5	4	5	3	3	4	3	3	4	3	3	3	3	3	4	3	3
174	女	38	本科	已婚	9年	3	3	4	3	3	4	4	5	4	4	5	4	4	4	3	4	4	3	4	4	4	4	3	4	3	4
175	女	29	大专	未婚	3年	3	4	3	4	3	3	4	4	4	5	4	5	3	4	3	3	4	3	4	3	3	4	3	4	3	3
176	女	33	高中	已婚	6年	4	3	5	4	3	4	5	5	5	4	5	5	2	3	3	2	3	3	2	3	2	3	2	3	2	3
177	女	27	本科	未婚	2年	2	2	3	2	3	2	3	2	3	3	4	3	4	4	5	4	5	4	5	4	5	4	5	5	4	5
178	女	36	硕士	已婚	8年	3	3	3	3	4	3	4	3	4	4	4	4	4	5	4	5	4	5	4	5	4	5	4	5	4	5
179	女	28	本科	未婚	2年	3	2	3	4	2	3	4	3	4	4	3	4	4	3	5	4	3	4	3	4	3	5	4	3	4	3
180	女	34	大专	已婚	6年	3	3	3	3	3	3	4	4	4	4	4	4	3	4	4	3	4	3	4	3	4	3	4	4	3	4
181	女	24	高中	未婚	1年	4	3	4	4	3	4	5	3	5	4	5	4	2	4	3	2	3	4	2	3	2	3	4	2	3	2
182	女	40	本科	已婚	10年	3	3	3	4	3	3	4	4	4	3	4	3	4	4	4	4	4	4	4	4	4	4	4	4	4	4
183	女	26	大专	未婚	1年	4	3	4	3	4	3	4	4	5	4	4	5	3	4	3	4	3	4	3	4	3	4	3	4	3	4
184	女	32	本科	已婚	5年	3	4	3	3	4	3	4	4	4	5	3	5	4	3	4	3	4	3	4	3	4	3	4	3	4	3
185	女	30	本科	未婚	3年	3	3	2	4	3	2	3	3	4	4	3	4	4	5	3	5	4	5	3	5	4	5	3	5	4	5
186	女	37	本科	已婚	8年	3	3	3	3	3	3	4	5	4	4	4	4	4	4	4	4	4	4	4	4	4	4	4	4	4	4
187	女	29	高中	未婚	2年	4	4	3	4	4	3	5	4	5	5	4	5	3	3	3	3	3	3	3	3	3	3	3	3	3	3
188	女	35	大专	已婚	7年	3	3	4	3	3	4	4	4	4	4	5	4	3	4	4	3	4	4	3	4	4	3	4	4	3	4
189	女	25	本科	未婚	1年	4	3	4	5	3	4	5	3	5	4	5	3	3	4	3	3	4	3	3	4	3	3	4	3	3	4
190	女	39	硕士	已婚	9年	3	4	3	3	4	3	4	4	4	5	4	5	4	5	4	5	4	5	4	5	4	5	4	5	4	5
191	女	33	大专	未婚	5年	3	2	3	3	2	3	3	2	4	3	4	3	4	3	4	3	4	3	4	3	4	3	4	3	4	3
192	女	28	大专	未婚	2年	3	3	3	4	3	3	4	3	4	4	4	4	3	4	3	4	3	4	3	4	3	4	3	4	3	4
193	女	34	本科	已婚	6年	4	3	4	3	4	3	4	4	5	4	5	4	4	3	4	3	4	3	4	3	4	3	4	3	4	3
194	女	25	本科	未婚	1年	3	4	2	4	3	2	4	3	4	5	3	5	3	3	4	2	3	4	2	3	2	3	4	2	3	2
195	女	31	大专	已婚	4年	3	3	4	3	3	4	4	5	4	4	5	4	4	4	3	4	4	3	4	4	4	4	3	4	3	4
196	女	29	本科	未婚	2年	3	2	3	4	2	3	4	3	4	4	3	4	4	5	4	3	5	4	3	5	4	5	4	3	5	4
197	女	26	大专	未婚	1年	4	3	4	4	3	4	5	4	5	4	5	4	3	3	4	3	3	4	3	3	3	3	4	3	3	4
198	女	35	本科	已婚	7年	3	3	3	3	4	3	4	3	4	4	4	4	4	4	4	4	4	4	4	4	4	4	4	4	4	4
199	女	43	本科	已婚	11年	2	3	2	3	2	3	3	3	3	4	3	4	5	4	5	4	4	5	4	5	4	5	5	4	5	4
200	女	28	本科	未婚	2年	3	2	3	2	3	2	3	2	3	3	4	3	4	4	5	4	5	4	5	4	5	4	5	4	5	4
201	女	33	大专	已婚	6年	3	4	3	4	3	3	4	4	4	5	4	5	3	4	3	3	4	3	4	3	3	4	3	4	3	3
202	女	30	本科	未婚	3年	3	3	2	4	3	2	3	3	4	4	3	4	4	5	3	5	4	5	3	5	4	5	3	5	4	5
203	女	37	硕士	已婚	8年	3	3	3	3	4	3	4	3	4	4	4	4	4	5	4	5	4	5	4	5	4	5	4	5	4	5
204	女	47	高中	已婚	14年	2	2	3	2	2	3	3	2	3	2	3	2	5	3	5	3	5	3	5	3	5	3	5	3	5	3
205	女	26	大专	未婚	2年	3	3	2	4	3	2	4	3	4	5	4	4	4	3	4	5	3	4	3	4	4	3	5	4	3	4
206	女	35	本科	已婚	7年	4	3	4	3	4	3	4	4	5	4	5	4	3	4	3	4	4	3	4	3	3	4	4	3	4	3
207	女	32	本科	已婚	5年	3	2	3	2	3	2	3	3	4	3	4	3	4	5	4	3	5	4	5	4	4	5	4	5	4	5
208	女	25	大专	未婚	1年	4	4	3	5	4	3	5	4	5	5	4	5	3	3	4	3	3	4	3	3	3	3	3	4	3	3
209	女	38	本科	已婚	9年	3	3	4	3	3	4	4	5	4	4	5	4	4	4	3	4	4	3	4	4	4	4	3	4	3	4
210	女	29	大专	未婚	3年	3	4	3	4	3	3	4	4	4	5	4	5	3	4	3	3	4	3	4	3	3	4	3	4	3	3
211	女	33	高中	已婚	6年	4	3	5	4	3	4	5	5	5	4	5	5	2	3	3	2	3	3	2	3	2	3	2	3	2	3
212	女	27	本科	未婚	2年	2	2	3	2	3	2	3	2	3	3	4	3	4	4	5	4	5	4	5	4	5	4	5	5	4	5
213	女	36	硕士	已婚	8年	3	3	3	3	4	3	4	3	4	4	4	4	4	5	4	5	4	5	4	5	4	5	4	5	4	5
214	女	28	本科	未婚	2年	3	2	3	4	2	3	4	3	4	4	3	4	4	3	5	4	3	4	3	4	3	5	4	3	4	3
215	女	34	大专	已婚	6年	3	3	3	3	3	3	4	4	4	4	4	4	3	4	4	3	4	3	4	3	4	3	4	4	3	4
216	女	24	高中	未婚	1年	4	3	4	4	3	4	5	3	5	4	5	4	2	4	3	2	3	4	2	3	2	3	4	2	3	2
217	女	40	本科	已婚	10年	3	3	3	4	3	3	4	4	4	3	4	3	4	4	4	4	4	4	4	4	4	4	4	4	4	4
218	女	26	大专	未婚	1年	4	3	4	3	4	3	4	4	5	4	4	5	3	4	3	4	3	4	3	4	3	4	3	4	3	4
219	女	32	本科	已婚	5年	3	4	3	3	4	3	4	4	4	5	3	5	4	3	4	3	4	3	4	3	4	3	4	3	4	3
220	女	30	本科	未婚	3年	3	3	2	4	3	2	3	3	4	4	3	4	4	5	3	5	4	5	3	5	4	5	3	5	4	5
221	女	37	本科	已婚	8年	3	3	3	3	3	3	4	5	4	4	4	4	4	4	4	4	4	4	4	4	4	4	4	4	4	4
222	女	29	高中	未婚	2年	4	4	3	4	4	3	5	4	5	5	4	5	3	3	3	3	3	3	3	3	3	3	3	3	3	3
223	女	35	大专	已婚	7年	3	3	4	3	3	4	4	4	4	4	5	4	3	4	4	3	4	4	3	4	4	3	4	4	3	4
224	女	25	本科	未婚	1年	4	3	4	5	3	4	5	3	5	4	5	3	3	4	3	3	4	3	3	4	3	3	4	3	3	4
225	女	39	硕士	已婚	9年	3	4	3	3	4	3	4	4	4	5	4	5	4	5	4	5	4	5	4	5	4	5	4	5	4	5
226	女	33	大专	未婚	5年	3	2	3	3	2	3	3	2	4	3	4	3	4	3	4	3	4	3	4	3	4	3	4	3	4	3
227	女	28	大专	未婚	2年	3	3	3	4	3	3	4	3	4	4	4	4	3	4	3	4	3	4	3	4	3	4	3	4	3	4
228	女	34	本科	已婚	6年	4	3	4	3	4	3	4	4	5	4	5	4	4	3	4	3	4	3	4	3	4	3	4	3	4	3
229	女	46	高中	已婚	13年	2	2	3	2	2	3	3	2	3	2	3	2	5	3	5	3	5	3	5	3	5	3	5	3	5	3
230	女	25	本科	未婚	1年	3	4	2	4	3	2	4	3	4	5	3	5	3	3	4	2	3	4	2	3	2	3	4	2	3	2
231	女	31	大专	已婚	4年	3	3	4	3	3	4	4	5	4	4	5	4	4	4	3	4	4	3	4	4	4	4	3	4	3	4
232	女	29	本科	未婚	2年	3	2	3	4	2	3	4	3	4	4	3	4	4	5	4	3	5	4	3	5	4	5	4	3	5	4
233	女	26	大专	未婚	1年	4	3	4	4	3	4	5	4	5	4	5	4	3	3	4	3	3	4	3	3	3	3	4	3	3	4
234	女	35	本科	已婚	7年	3	3	3	3	4	3	4	3	4	4	4	4	4	4	4	4	4	4	4	4	4	4	4	4	4	4
235	女	43	本科	已婚	11年	2	3	2	3	2	3	3	3	3	4	3	4	5	4	5	4	4	5	4	5	4	5	5	4	5	4
236	女	28	本科	未婚	2年	3	2	3	2	3	2	3	2	3	3	4	3	4	4	5	4	5	4	5	4	5	4	5	4	5	4
237	女	33	大专	已婚	6年	3	4	3	4	3	3	4	4	4	5	4	5	3	4	3	3	4	3	4	3	3	4	3	4	3	3
238	女	30	本科	未婚	3年	3	3	2	4	3	2	3	3	4	4	3	4	4	5	3	5	4	5	3	5	4	5	3	5	4	5
239	女	37	硕士	已婚	8年	3	3	3	3	4	3	4	3	4	4	4	4	4	5	4	5	4	5	4	5	4	5	4	5	4	5
240	女	47	高中	已婚	14年	2	2	3	2	2	3	3	2	3	2	3	2	5	3	5	3	5	3	5	3	5	3	5	3	5	3
241	女	26	大专	未婚	2年	3	3	2	4	3	2	4	3	4	5	4	4	4	3	4	5	3	4	3	4	4	3	5	4	3	4
242	女	35	本科	已婚	7年	4	3	4	3	4	3	4	4	5	4	5	4	3	4	3	4	4	3	4	3	3	4	4	3	4	3
243	女	32	本科	已婚	5年	3	2	3	2	3	2	3	3	4	3	4	3	4	5	4	3	5	4	5	4	4	5	4	5	4	5
244	女	25	大专	未婚	1年	4	4	3	5	4	3	5	4	5	5	4	5	3	3	4	3	3	4	3	3	3	3	3	4	3	3
245	女	38	本科	已婚	9年	3	3	4	3	3	4	4	5	4	4	5	4	4	4	3	4	4	3	4	4	4	4	3	4	3	4
246	女	29	大专	未婚	3年	3	4	3	4	3	3	4	4	4	5	4	5	3	4	3	3	4	3	4	3	3	4	3	4	3	3
247	女	33	高中	已婚	6年	4	3	5	4	3	4	5	5	5	4	5	5	2	3	3	2	3	3	2	3	2	3	2	3	2	3
248	女	27	本科	未婚	2年	2	2	3	2	3	2	3	2	3	3	4	3	4	4	5	4	5	4	5	4	5	4	5	5	4	5
249	女	36	硕士	已婚	8年	3	3	3	3	4	3	4	3	4	4	4	4	4	5	4	5	4	5	4	5	4	5	4	5	4	5
250	女	28	本科	未婚	2年	3	2	3	4	2	3	4	3	4	4	3	4	4	3	5	4	3	4	3	4	3	5	4	3	4	3
251	女	34	大专	已婚	6年	3	3	3	3	3	3	4	4	4	4	4	4	3	4	4	3	4	3	4	3	4	3	4	4	3	4
252	女	24	高中	未婚	1年	4	3	4	4	3	4	5	3	5	4	5	4	2	4	3	2	3	4	2	3	2	3	4	2	3	2
253	女	40	本科	已婚	10年	3	3	3	4	3	3	4	4	4	3	4	3	4	4	4	4	4	4	4	4	4	4	4	4	4	4
254	女	26	大专	未婚	1年	4	3	4	3	4	3	4	4	5	4	4	5	3	4	3	4	3	4	3	4	3	4	3	4	3	4
255	女	32	本科	已婚	5年	3	4	3	3	4	3	4	4	4	5	3	5	4	3	4	3	4	3	4	3	4	3	4	3	4	3
256	女	30	本科	未婚	3年	3	3	2	4	3	2	3	3	4	4	3	4	4	5	3	5	4	5	3	5	4	5	3	5	4	5
257	女	37	本科	已婚	8年	3	3	3	3	3	3	4	5	4	4	4	4	4	4	4	4	4	4	4	4	4	4	4	4	4	4
258	女	29	高中	未婚	2年	4	4	3	4	4	3	5	4	5	5	4	5	3	3	3	3	3	3	3	3	3	3	3	3	3	3
259	女	35	大专	已婚	7年	3	3	4	3	3	4	4	4	4	4	5	4	3	4	4	3	4	4	3	4	4	3	4	4	3	4
260	女	25	本科	未婚	1年	4	3	4	5	3	4	5	3	5	4	5	3	3	4	3	3	4	3	3	4	3	3	4	3	3	4
261	女	39	硕士	已婚	9年	3	4	3	3	4	3	4	4	4	5	4	5	4	5	4	5	4	5	4	5	4	5	4	5	4	5
262	女	33	大专	未婚	5年	3	2	3	3	2	3	3	2	4	3	4	3	4	3	4	3	4	3	4	3	4	3	4	3	4	3
263	女	28	大专	未婚	2年	3	3	3	4	3	3	4	3	4	4	4	4	3	4	3	4	3	4	3	4	3	4	3	4	3	4
264	女	34	本科	已婚	6年	4	3	4	3	4	3	4	4	5	4	5	4	4	3	4	3	4	3	4	3	4	3	4	3	4	3
265	女	46	高中	已婚	13年	2	2	3	2	2	3	3	2	3	2	3	2	5	3	5	3	5	3	5	3	5	3	5	3	5	3
266	女	25	本科	未婚	1年	3	4	2	4	3	2	4	3	4	5	3	5	3	3	4	2	3	4	2	3	2	3	4	2	3	2
267	女	31	大专	已婚	4年	3	3	4	3	3	4	4	5	4	4	5	4	4	4	3	4	4	3	4	4	4	4	3	4	3	4
268	女	29	本科	未婚	2年	3	2	3	4	2	3	4	3	4	4	3	4	4	5	4	3	5	4	3	5	4	5	4	3	5	4
269	女	26	大专	未婚	1年	4	3	4	4	3	4	5	4	5	4	5	4	3	3	4	3	3	4	3	3	3	3	4	3	3	4
270	女	35	本科	已婚	7年	3	3	3	3	4	3	4	3	4	4	4	4	4	4	4	4	4	4	4	4	4	4	4	4	4	4
271	女	43	本科	已婚	11年	2	3	2	3	2	3	3	3	3	4	3	4	5	4	5	4	4	5	4	5	4	5	5	4	5	4
272	女	28	本科	未婚	2年	3	2	3	2	3	2	3	2	3	3	4	3	4	4	5	4	5	4	5	4	5	4	5	4	5	4
273	女	33	大专	已婚	6年	3	4	3	4	3	3	4	4	4	5	4	5	3	4	3	3	4	3	4	3	3	4	3	4	3	3
274	女	30	本科	未婚	3年	3	3	2	4	3	2	3	3	4	4	3	4	4	5	3	5	4	5	3	5	4	5	3	5	4	5
275	女	37	硕士	已婚	8年	3	3	3	3	4	3	4	3	4	4	4	4	4	5	4	5	4	5	4	5	4	5	4	5	4	5
276	女	47	高中	已婚	14年	2	2	3	2	2	3	3	2	3	2	3	2	5	3	5	3	5	3	5	3	5	3	5	3	5	3
277	女	26	大专	未婚	2年	3	3	2	4	3	2	4	3	4	5	4	4	4	3	4	5	3	4	3	4	4	3	5	4	3	4
278	女	35	本科	已婚	7年	4	3	4	3	4	3	4	4	5	4	5	4	3	4	3	4	4	3	4	3	3	4	4	3	4	3
279	女	32	本科	已婚	5年	3	2	3	2	3	2	3	3	4	3	4	3	4	5	4	3	5	4	5	4	4	5	4	5	4	5
280	女	25	大专	未婚	1年	4	4	3	5	4	3	5	4	5	5	4	5	3	3	4	3	3	4	3	3	3	3	3	4	3	3
281	女	38	本科	已婚	9年	3	3	4	3	3	4	4	5	4	4	5	4	4	4	3	4	4	3	4	4	4	4	3	4	3	4
282	女	29	大专	未婚	3年	3	4	3	4	3	3	4	4	4	5	4	5	3	4	3	3	4	3	4	3	3	4	3	4	3	3
283	女	33	高中	已婚	6年	4	3	5	4	3	4	5	5	5	4	5	5	2	3	3	2	3	3	2	3	2	3	2	3	2	3
284	女	27	本科	未婚	2年	2	2	3	2	3	2	3	2	3	3	4	3	4	4	5	4	5	4	5	4	5	4	5	5	4	5
285	女	36	硕士	已婚	8年	3	3	3	3	4	3	4	3	4	4	4	4	4	5	4	5	4	5	4	5	4	5	4	5	4	5
286	女	28	本科	未婚	2年	3	2	3	4	2	3	4	3	4	4	3	4	4	3	5	4	3	4	3	4	3	5	4	3	4	3
287	女	34	大专	已婚	6年	3	3	3	3	3	3	4	4	4	4	4	4	3	4	4	3	4	3	4	3	4	3	4	4	3	4
288	女	24	高中	未婚	1年	4	3	4	4	3	4	5	3	5	4	5	4	2	4	3	2	3	4	2	3	2	3	4	2	3	2
289	女	40	本科	已婚	10年	3	3	3	4	3	3	4	4	4	3	4	3	4	4	4	4	4	4	4	4	4	4	4	4	4	4
290	女	26	大专	未婚	1年	4	3	4	3	4	3	4	4	5	4	4	5	3	4	3	4	3	4	3	4	3	4	3	4	3	4
291	女	32	本科	已婚	5年	3	4	3	3	4	3	4	4	4	5	3	5	4	3	4	3	4	3	4	3	4	3	4	3	4	3
292	女	30	本科	未婚	3年	3	3	2	4	3	2	3	3	4	4	3	4	4	5	3	5	4	5	3	5	4	5	3	5	4	5
293	女	37	本科	已婚	8年	3	3	3	3	3	3	4	5	4	4	4	4	4	4	4	4	4	4	4	4	4	4	4	4	4	4
294	女	29	高中	未婚	2年	4	4	3	4	4	3	5	4	5	5	4	5	3	3	3	3	3	3	3	3	3	3	3	3	3	3
295	女	35	大专	已婚	7年	3	3	4	3	3	4	4	4	4	4	5	4	3	4	4	3	4	4	3	4	4	3	4	4	3	4
296	女	25	本科	未婚	1年	4	3	4	5	3	4	5	3	5	4	5	3	3	4	3	3	4	3	3	4	3	3	4	3	3	4
297	女	39	硕士	已婚	9年	3	4	3	3	4	3	4	4	4	5	4	5	4	5	4	5	4	5	4	5	4	5	4	5	4	5
298	女	33	大专	未婚	5年	3	2	3	3	2	3	3	2	4	3	4	3	4	3	4	3	4	3	4	3	4	3	4	3	4	3
299	女	28	大专	未婚	2年	3	3	3	4	3	3	4	3	4	4	4	4	3	4	3	4	3	4	3	4	3	4	3	4	3	4
300	女	34	本科	已婚	6年	4	3	4	3	4	3	4	4	5	4	5	4	4	3	4	3	4	3	4	3	4	3	4	3	4	3
301	女	46	高中	已婚	13年	2	2	3	2	2	3	3	2	3	2	3	2	5	3	5	3	5	3	5	3	5	3	5	3	5	3
302	女	25	本科	未婚	1年	3	4	2	4	3	2	4	3	4	5	3	5	3	3	4	2	3	4	2	3	2	3	4	2	3	2
303	女	31	大专	已婚	4年	3	3	4	3	3	4	4	5	4	4	5	4	4	4	3	4	4	3	4	4	4	4	3	4	3	4
304	女	29	本科	未婚	2年	3	2	3	4	2	3	4	3	4	4	3	4	4	5	4	3	5	4	3	5	4	5	4	3	5	4
305	女	26	大专	未婚	1年	4	3	4	4	3	4	5	4	5	4	5	4	3	3	4	3	3	4	3	3	3	3	4	3	3	4
306	女	35	本科	已婚	7年	3	3	3	3	4	3	4	3	4	4	4	4	4	4	4	4	4	4	4	4	4	4	4	4	4	4
307	女	43	本科	已婚	11年	2	3	2	3	2	3	3	3	3	4	3	4	5	4	5	4	4	5	4	5	4	5	5	4	5	4
308	女	28	本科	未婚	2年	3	2	3	2	3	2	3	2	3	3	4	3	4	4	5	4	5	4	5	4	5	4	5	4	5	4
309	女	33	大专	已婚	6年	3	4	3	4	3	3	4	4	4	5	4	5	3	4	3	3	4	3	4	3	3	4	3	4	3	3
310	女	30	本科	未婚	3年	3	3	2	4	3	2	3	3	4	4	3	4	4	5	3	5	4	5	3	5	4	5	3	5	4	5
311	女	37	硕士	已婚	8年	3	3	3	3	4	3	4	3	4	4	4	4	4	5	4	5	4	5	4	5	4	5	4	5	4	5
312	女	47	高中	已婚	14年	2	2	3	2	2	3	3	2	3	2	3	2	5	3	5	3	5	3	5	3	5	3	5	3	5	3
313	女	26	大专	未婚	2年	3	3	2	4	3	2	4	3	4	5	4	4	4	3	4	5	3	4	3	4	4	3	5	4	3	4
314	女	35	本科	已婚	7年	4	3	4	3	4	3	4	4	5	4	5	4	3	4	3	4	4	3	4	3	3	4	4	3	4	3
315	女	32	本科	已婚	5年	3	2	3	2	3	2	3	3	4	3	4	3	4	5	4	3	5	4	5	4	4	5	4	5	4	5
316	女	25	大专	未婚	1年	4	4	3	5	4	3	5	4	5	5	4	5	3	3	4	3	3	4	3	3	3	3	3	4	3	3
317	女	38	本科	已婚	9年	3	3	4	3	3	4	4	5	4	4	5	4	4	4	3	4	4	3	4	4	4	4	3	4	3	4
318	女	29	大专	未婚	3年	3	4	3	4	3	3	4	4	4	5	4	5	3	4	3	3	4	3	4	3	3	4	3	4	3	3
319	女	33	高中	已婚	6年	4	3	5	4	3	4	5	5	5	4	5	5	2	3	3	2	3	3	2	3	2	3	2	3	2	3
320	女	27	本科	未婚	2年	2	2	3	2	3	2	3	2	3	3	4	3	4	4	5	4	5	4	5	4	5	4	5	5	4	5
321	女	36	硕士	已婚	8年	3	3	3	3	4	3	4	3	4	4	4	4	4	5	4	5	4	5	4	5	4	5	4	5	4	5
322	女	28	本科	未婚	2年	3	2	3	4	2	3	4	3	4	4	3	4	4	3	5	4	3	4	3	4	3	5	4	3	4	3
323	女	34	大专	已婚	6年	3	3	3	3	3	3	4	4	4	4	4	4	3	4	4	3	4	3	4	3	4	3	4	4	3	4
324	女	24	高中	未婚	1年	4	3	4	4	3	4	5	3	5	4	5	4	2	4	3	2	3	4	2	3	2	3	4	2	3	2
325	女	40	本科	已婚	10年	3	3	3	4	3	3	4	4	4	3	4	3	4	4	4	4	4	4	4	4	4	4	4	4	4	4
326	女	26	大专	未婚	1年	4	3	4	3	4	3	4	4	5	4	4	5	3	4	3	4	3	4	3	4	3	4	3	4	3	4
327	女	32	本科	已婚	5年	3	4	3	3	4	3	4	4	4	5	3	5	4	3	4	3	4	3	4	3	4	3	4	3	4	3
328	女	30	本科	未婚	3年	3	3	2	4	3	2	3	3	4	4	3	4	4	5	3	5	4	5	3	5	4	5	3	5	4	5
329	女	37	本科	已婚	8年	3	3	3	3	3	3	4	5	4	4	4	4	4	4	4	4	4	4	4	4	4	4	4	4	4	4
330	女	29	高中	未婚	2年	4	4	3	4	4	3	5	4	5	5	4	5	3	3	3	3	3	3	3	3	3	3	3	3	3	3
331	女	35	大专	已婚	7年	3	3	4	3	3	4	4	4	4	4	5	4	3	4	4	3	4	4	3	4	4	3	4	4	3	4
332	女	25	本科	未婚	1年	4	3	4	5	3	4	5	3	5	4	5	3	3	4	3	3	4	3	3	4	3	3	4	3	3	4
333	女	39	硕士	已婚	9年	3	4	3	3	4	3	4	4	4	5	4	5	4	5	4	5	4	5	4	5	4	5	4	5	4	5
334	女	33	大专	未婚	5年	3	2	3	3	2	3	3	2	4	3	4	3	4	3	4	3	4	3	4	3	4	3	4	3	4	3
335	女	28	大专	未婚	2年	3	3	3	4	3	3	4	3	4	4	4	4	3	4	3	4	3	4	3	4	3	4	3	4	3	4
336	女	34	本科	已婚	6年	4	3	4	3	4	3	4	4	5	4	5	4	4	3	4	3	4	3	4	3	4	3	4	3	4	3
337	女	46	高中	已婚	13年	2	2	3	2	2	3	3	2	3	2	3	2	5	3	5	3	5	3	5	3	5	3	5	3	5	3
338	女	25	本科	未婚	1年	3	4	2	4	3	2	4	3	4	5	3	5	3	3	4	2	3	4	2	3	2	3	4	2	3	2
339	女	31	大专	已婚	4年	3	3	4	3	3	4	4	5	4	4	5	4	4	4	3	4	4	3	4	4	4	4	3	4	3	4
340	女	29	本科	未婚	2年	3	2	3	4	2	3	4	3	4	4	3	4	4	5	4	3	5	4	3	5	4	5	4	3	5	4
341	女	26	大专	未婚	1年	4	3	4	4	3	4	5	4	5	4	5	4	3	3	4	3	3	4	3	3	3	3	4	3	3	4
342	女	35	本科	已婚	7年	3	3	3	3	4	3	4	3	4	4	4	4	4	4	4	4	4	4	4	4	4	4	4	4	4	4
343	女	43	本科	已婚	11年	2	3	2	3	2	3	3	3	3	4	3	4	5	4	5	4	4	5	4	5	4	5	5	4	5	4
344	女	28	本科	未婚	2年	3	2	3	2	3	2	3	2	3	3	4	3	4	4	5	4	5	4	5	4	5	4	5	4	5	4
345	女	33	大专	已婚	6年	3	4	3	4	3	3	4	4	4	5	4	5	3	4	3	3	4	3	4	3	3	4	3	4	3	3
346	女	30	本科	未婚	3年	3	3	2	4	3	2	3	3	4	4	3	4	4	5	3	5	4	5	3	5	4	5	3	5	4	5
347	女	37	硕士	已婚	8年	3	3	3	3	4	3	4	3	4	4	4	4	4	5	4	5	4	5	4	5	4	5	4	5	4	5
348	女	47	高中	已婚	14年	2	2	3	2	2	3	3	2	3	2	3	2	5	3	5	3	5	3	5	3	5	3	5	3	5	3
349	女	26	大专	未婚	2年	3	3	2	4	3	2	4	3	4	5	4	4	4	3	4	5	3	4	3	4	4	3	5	4	3	4
350	女	35	本科	已婚	7年	4	3	4	3	4	3	4	4	5	4	5	4	3	4	3	4	4	3	4	3	3	4	4	3	4	3
351	女	32	本科	已婚	5年	3	2	3	2	3	2	3	3	4	3	4	3	4	5	4	3	5	4	5	4	4	5	4	5	4	5
352	女	25	大专	未婚	1年	4	4	3	5	4	3	5	4	5	5	4	5	3	3	4	3	3	4	3	3	3	3	3	4	3	3
353	女	38	本科	已婚	9年	3	3	4	3	3	4	4	5	4	4	5	4	4	4	3	4	4	3	4	4	4	4	3	4	3	4
354	女	29	大专	未婚	3年	3	4	3	4	3	3	4	4	4	5	4	5	3	4	3	3	4	3	4	3	3	4	3	4	3	3
355	女	33	高中	已婚	6年	4	3	5	4	3	4	5	5	5	4	5	5	2	3	3	2	3	3	2	3	2	3	2	3	2	3
356	女	27	本科	未婚	2年	2	2	3	2	3	2	3	2	3	3	4	3	4	4	5	4	5	4	5	4	5	4	5	5	4	5
357	女	36	硕士	已婚	8年	3	3	3	3	4	3	4	3	4	4	4	4	4	5	4	5	4	5	4	5	4	5	4	5	4	5
358	女	28	本科	未婚	2年	3	2	3	4	2	3	4	3	4	4	3	4	4	3	5	4	3	4	3	4	3	5	4	3	4	3
359	女	34	大专	已婚	6年	3	3	3	3	3	3	4	4	4	4	4	4	3	4	4	3	4	3	4	3	4	3	4	4	3	4
360	女	24	高中	未婚	1年	4	3	4	4	3	4	5	3	5	4	5	4	2	4	3	2	3	4	2	3	2	3	4	2	3	2
361	女	40	本科	已婚	10年	3	3	3	4	3	3	4	4	4	3	4	3	4	4	4	4	4	4	4	4	4	4	4	4	4	4
362	女	26	大专	未婚	1年	4	3	4	3	4	3	4	4	5	4	4	5	3	4	3	4	3	4	3	4	3	4	3	4	3	4
363	女	32	本科	已婚	5年	3	4	3	3	4	3	4	4	4	5	3	5	4	3	4	3	4	3	4	3	4	3	4	3	4	3
364	女	30	本科	未婚	3年	3	3	2	4	3	2	3	3	4	4	3	4	4	5	3	5	4	5	3	5	4	5	3	5	4	5
365	女	37	本科	已婚	8年	3	3	3	3	3	3	4	5	4	4	4	4	4	4	4	4	4	4	4	4	4	4	4	4	4	4
366	女	29	高中	未婚	2年	4	4	3	4	4	3	5	4	5	5	4	5	3	3	3	3	3	3	3	3	3	3	3	3	3	3
367	女	35	大专	已婚	7年	3	3	4	3	3	4	4	4	4	4	5	4	3	4	4	3	4	4	3	4	4	3	4	4	3	4
368	女	25	本科	未婚	1年	4	3	4	5	3	4	5	3	5	4	5	3	3	4	3	3	4	3	3	4	3	3	4	3	3	4
369	女	39	硕士	已婚	9年	3	4	3	3	4	3	4	4	4	5	4	5	4	5	4	5	4	5	4	5	4	5	4	5	4	5
370	女	33	大专	未婚	5年	3	2	3	3	2	3	3	2	4	3	4	3	4	3	4	3	4	3	4	3	4	3	4	3	4	3
371	女	28	大专	未婚	2年	3	3	3	4	3	3	4	3	4	4	4	4	3	4	3	4	3	4	3	4	3	4	3	4	3	4
372	女	34	本科	已婚	6年	4	3	4	3	4	3	4	4	5	4	5	4	4	3	4	3	4	3	4	3	4	3	4	3	4	3
373	女	46	高中	已婚	13年	2	2	3	2	2	3	3	2	3	2	3	2	5	3	5	3	5	3	5	3	5	3	5	3	5	3
374	女	25	本科	未婚	1年	3	4	2	4	3	2	4	3	4	5	3	5	3	3	4	2	3	4	2	3	2	3	4	2	3	2
375	女	31	大专	已婚	4年	3	3	4	3	3	4	4	5	4	4	5	4	4	4	3	4	4	3	4	4	4	4	3	4	3	4
376	女	29	本科	未婚	2年	3	2	3	4	2	3	4	3	4	4	3	4	4	5	4	3	5	4	3	5	4	5	4	3	5	4
377	女	26	大专	未婚	1年	4	3	4	4	3	4	5	4	5	4	5	4	3	3	4	3	3	4	3	3	3	3	4	3	3	4
378	女	35	本科	已婚	7年	3	3	3	3	4	3	4	3	4	4	4	4	4	4	4	4	4	4	4	4	4	4	4	4	4	4
379	女	43	本科	已婚	11年	2	3	2	3	2	3	3	3	3	4	3	4	5	4	5	4	4	5	4	5	4	5	5	4	5	4
380	女	28	本科	未婚	2年	3	2	3	2	3	2	3	2	3	3	4	3	4	4	5	4	5	4	5	4	5	4	5	4	5	4
381	女	33	大专	已婚	6年	3	4	3	4	3	3	4	4	4	5	4	5	3	4	3	3	4	3	4	3	3	4	3	4	3	3
382	女	30	本科	未婚	3年	3	3	2	4	3	2	3	3	4	4	3	4	4	5	3	5	4	5	3	5	4	5	3	5	4	5
383	女	37	硕士	已婚	8年	3	3	3	3	4	3	4	3	4	4	4	4	4	5	4	5	4	5	4	5	4	5	4	5	4	5
384	女	47	高中	已婚	14年	2	2	3	2	2	3	3	2	3	2	3	2	5	3	5	3	5	3	5	3	5	3	5	3	5	3
385	女	26	大专	未婚	2年	3	3	2	4	3	2	4	3	4	5	4	4	4	3	4	5	3	4	3	4	4	3	5	4	3	4
386	女	35	本科	已婚	7年	4	3	4	3	4	3	4	4	5	4	5	4	3	4	3	4	4	3	4	3	3	4	4	3	4	3
387	女	32	本科	已婚	5年	3	2	3	2	3	2	3	3	4	3	4	3	4	5	4	3	5	4	5	4	4	5	4	5	4	5
388	女	25	大专	未婚	1年	4	4	3	5	4	3	5	4	5	5	4	5	3	3	4	3	3	4	3	3	3	3	3	4	3	3
389	女	38	本科	已婚	9年	3	3	4	3	3	4	4	5	4	4	5	4	4	4	3	4	4	3	4	4	4	4	3	4	3	4
390	女	29	大专	未婚	3年	3	4	3	4	3	3	4	4	4	5	4	5	3	4	3	3	4	3	4	3	3	4	3	4	3	3
391	女	33	高中	已婚	6年	4	3	5	4	3	4	5	5	5	4	5	5	2	3	3	2	3	3	2	3	2	3	2	3	2	3
392	女	27	本科	未婚	2年	2	2	3	2	3	2	3	2	3	3	4	3	4	4	5	4	5	4	5	4	5	4	5	5	4	5
393	女	36	硕士	已婚	8年	3	3	3	3	4	3	4	3	4	4	4	4	4	5	4	5	4	5	4	5	4	5	4	5	4	5
394	女	28	本科	未婚	2年	3	2	3	4	2	3	4	3	4	4	3	4	4	3	5	4	3	4	3	4	3	5	4	3	4	3
395	女	34	大专	已婚	6年	3	3	3	3	3	3	4	4	4	4	4	4	3	4	4	3	4	3	4	3	4	3	4	4	3	4
396	女	24	高中	未婚	1年	4	3	4	4	3	4	5	3	5	4	5	4	2	4	3	2	3	4	2	3	2	3	4	2	3	2
397	女	40	本科	已婚	10年	3	3	3	4	3	3	4	4	4	3	4	3	4	4	4	4	4	4	4	4	4	4	4	4	4	4
398	女	26	大专	未婚	1年	4	3	4	3	4	3	4	4	5	4	4	5	3	4	3	4	3	4	3	4	3	4	3	4	3	4
399	女	32	本科	已婚	5年	3	4	3	3	4	3	4	4	4	5	3	5	4	3	4	3	4	3	4	3	4	3	4	3	4	3
400	女	30	本科	未婚	3年	3	3	2	4	3	2	3	3	4	4	3	4	4	5	3	5	4	5	3	5	4	5	3	5	4	5
401	女	37	本科	已婚	8年	3	3	3	3	3	3	4	5	4	4	4	4	4	4	4	4	4	4	4	4	4	4	4	4	4	4
402	女	29	高中	未婚	2年	4	4	3	4	4	3	5	4	5	5	4	5	3	3	3	3	3	3	3	3	3	3	3	3	3	3
403	女	35	大专	已婚	7年	3	3	4	3	3	4	4	4	4	4	5	4	3	4	4	3	4	4	3	4	4	3	4	4	3	4
404	女	25	本科	未婚	1年	4	3	4	5	3	4	5	3	5	4	5	3	3	4	3	3	4	3	3	4	3	3	4	3	3	4
405	女	39	硕士	已婚	9年	3	4	3	3	4	3	4	4	4	5	4	5	4	5	4	5	4	5	4	5	4	5	4	5	4	5
406	女	33	大专	未婚	5年	3	2	3	3	2	3	3	2	4	3	4	3	4	3	4	3	4	3	4	3	4	3	4	3	4	3
407	女	28	大专	未婚	2年	3	3	3	4	3	3	4	3	4	4	4	4	3	4	3	4	3	4	3	4	3	4	3	4	3	4
408	女	34	本科	已婚	6年	4	3	4	3	4	3	4	4	5	4	5	4	4	3	4	3	4	3	4	3	4	3	4	3	4	3
409	女	46	高中	已婚	13年	2	2	3	2	2	3	3	2	3	2	3	2	5	3	5	3	5	3	5	3	5	3	5	3	5	3
410	女	25	本科	未婚	1年	3	4	2	4	3	2	4	3	4	5	3	5	3	3	4	2	3	4	2	3	2	3	4	2	3	2
411	女	31	大专	已婚	4年	3	3	4	3	3	4	4	5	4	4	5	4	4	4	3	4	4	3	4	4	4	4	3	4	3	4
412	女	29	本科	未婚	2年	3	2	3	4	2	3	4	3	4	4	3	4	4	5	4	3	5	4	3	5	4	5	4	3	5	4
413	男	27	本科	未婚	2年	2	2	3	2	3	2	3	2	3	3	4	3	4	4	5	4	5	4	5	4	5	4	5	5	4	5
414	男	32	本科	已婚	5年	3	2	3	2	3	2	3	3	4	3	4	3	4	5	4	3	5	4	5	4	4	5	4	5	4	5
415	男	30	本科	未婚	3年	3	3	2	4	3	2	3	3	4	4	3	4	4	5	3	5	4	5	3	5	4	5	3	5	4	5
416	男	31	大专	未婚	4年	3	2	2	3	3	2	3	2	4	3	3	4	4	3	4	3	4	3	3	4	3	4	3	4	3	4
417	男	33	大专	未婚	5年	3	2	3	3	2	3	3	2	4	3	4	3	4	3	4	3	4	3	4	3	4	3	4	3	4	3
418	男	29	本科	未婚	2年	3	2	3	4	2	3	4	3	4	4	3	4	4	5	4	3	5	4	3	5	4	5	4	3	5	4
419	男	45	本科	已婚	12年	2	3	2	3	2	3	3	3	3	4	3	4	5	4	5	4	4	5	4	5	4	5	5	4	5	4
420	男	48	大专	已婚	15年	2	2	2	3	2	2	3	2	3	2	3	2	5	3	5	3	5	3	5	3	5	3	5	3	5	3
421	男	42	本科	已婚	11年	2	3	2	2	3	2	3	3	3	3	3	3	5	4	4	5	4	4	5	4	4	5	4	4	5	4
422	男	46	高中	已婚	13年	2	2	3	2	2	3	3	2	3	2	3	2	5	3	5	3	5	3	5	3	5	3	5	3	5	3
423	男	43	本科	已婚	11年	2	3	2	3	2	3	3	3	3	4	3	4	5	4	5	4	4	5	4	5	4	5	5	4	5	4
424	男	44	本科	已婚	12年	2	3	2	3	2	3	3	3	3	4	3	4	5	4	5	4	4	5	4	5	4	5	5	4	5	4
425	男	47	高中	已婚	14年	2	2	3	2	2	3	3	2	3	2	3	2	5	3	5	3	5	3	5	3	5	3	5	3	5	3
426	男	28	本科	未婚	2年	3	2	3	2	3	2	3	2	3	3	4	3	4	4	5	4	5	4	5	4	5	4	5	4	5	4
427	男	26	大专	未婚	1年	4	3	4	4	3	4	5	4	5	4	5	4	3	3	4	3	3	4	3	3	3	3	4	3	3	4
428	男	25	大专	未婚	1年	4	4	3	5	4	3	5	4	5	5	4	5	3	3	4	3	3	4	3	3	3	3	3	4	3	3
429	男	24	高中	未婚	1年	4	3	4	4	3	4	5	3	5	4	5	4	2	4	3	2	3	4	2	3	2	3	4	2	3	2
430	男	25	本科	未婚	1年	4	3	4	5	3	4	5	3	5	4	5	3	3	4	3	3	4	3	3	4	3	3	4	3	3	4
431	男	27	本科	未婚	2年	2	2	3	2	3	2	3	2	3	3	4	3	4	4	5	4	5	4	5	4	5	4	5	5	4	5
432	男	29	本科	未婚	2年	3	2	3	4	2	3	4	3	4	4	3	4	4	5	4	3	5	4	3	5	4	5	4	3	5	4
433	男	30	本科	未婚	3年	3	3	2	4	3	2	3	3	4	4	3	4	4	5	3	5	4	5	3	5	4	5	3	5	4	5
434	男	31	大专	未婚	4年	3	2	2	3	3	2	3	2	4	3	3	4	4	3	4	3	4	3	3	4	3	4	3	4	3	4
435	男	33	大专	未婚	5年	3	2	3	3	2	3	3	2	4	3	4	3	4	3	4	3	4	3	4	3	4	3	4	3	4	3
436	男	30	本科	未婚	3年	3	3	2	4	3	2	3	3	4	4	3	4	4	5	3	5	4	5	3	5	4	5	3	5	4	5
437	男	32	本科	已婚	5年	3	2	3	2	3	2	3	3	4	3	4	3	4	5	4	3	5	4	5	4	4	5	4	5	4	5
438	男	35	本科	已婚	7年	4	3	4	3	4	3	4	4	5	4	5	4	3	4	3	4	4	3	4	3	3	4	4	3	4	3
439	男	34	本科	已婚	6年	4	3	4	3	4	3	4	4	5	4	5	4	4	3	4	3	4	3	4	3	4	3	4	3	4	3
440	男	38	本科	已婚	9年	3	3	4	3	3	4	4	5	4	4	5	4	4	4	3	4	4	3	4	4	4	4	3	4	3	4
441	男	39	硕士	已婚	9年	3	4	3	3	4	3	4	4	4	5	4	5	4	5	4	5	4	5	4	5	4	5	4	5	4	5
442	男	37	硕士	已婚	8年	3	3	3	3	4	3	4	3	4	4	4	4	4	5	4	5	4	5	4	5	4	5	4	5	4	5
443	男	36	硕士	已婚	8年	3	3	3	3	4	3	4	3	4	4	4	4	4	5	4	5	4	5	4	5	4	5	4	5	4	5
444	男	40	本科	已婚	10年	3	3	3	4	3	3	4	4	4	3	4	3	4	4	4	4	4	4	4	4	4	4	4	4	4	4
445	男	45	本科	已婚	12年	2	3	2	3	2	3	3	3	3	4	3	4	5	4	5	4	4	5	4	5	4	5	5	4	5	4
446	男	48	大专	已婚	15年	2	2	2	3	2	2	3	2	3	2	3	2	5	3	5	3	5	3	5	3	5	3	5	3	5	3
447	男	42	本科	已婚	11年	2	3	2	2	3	2	3	3	3	3	3	3	5	4	4	5	4	4	5	4	4	5	4	4	5	4
448	男	46	高中	已婚	13年	2	2	3	2	2	3	3	2	3	2	3	2	5	3	5	3	5	3	5	3	5	3	5	3	5	3
449	男	43	本科	已婚	11年	2	3	2	3	2	3	3	3	3	4	3	4	5	4	5	4	4	5	4	5	4	5	5	4	5	4
450	男	44	本科	已婚	12年	2	3	2	3	2	3	3	3	3	4	3	4	5	4	5	4	4	5	4	5	4	5	5	4	5	4
451	男	47	高中	已婚	14年	2	2	3	2	2	3	3	2	3	2	3	2	5	3	5	3	5	3	5	3	5	3	5	3	5	3
452	男	28	本科	未婚	2年	3	2	3	2	3	2	3	2	3	3	4	3	4	4	5	4	5	4	5	4	5	4	5	4	5	4
453	男	26	大专	未婚	1年	4	3	4	4	3	4	5	4	5	4	5	4	3	3	4	3	3	4	3	3	3	3	4	3	3	4
454	男	25	大专	未婚	1年	4	4	3	5	4	3	5	4	5	5	4	5	3	3	4	3	3	4	3	3	3	3	3	4	3	3
455	男	24	高中	未婚	1年	4	3	4	4	3	4	5	3	5	4	5	4	2	4	3	2	3	4	2	3	2	3	4	2	3	2
456	男	25	本科	未婚	1年	4	3	4	5	3	4	5	3	5	4	5	3	3	4	3	3	4	3	3	4	3	3	4	3	3	4
457	男	27	本科	未婚	2年	2	2	3	2	3	2	3	2	3	3	4	3	4	4	5	4	5	4	5	4	5	4	5	5	4	5
458	男	29	本科	未婚	2年	3	2	3	4	2	3	4	3	4	4	3	4	4	5	4	3	5	4	3	5	4	5	4	3	5	4
459	男	30	本科	未婚	3年	3	3	2	4	3	2	3	3	4	4	3	4	4	5	3	5	4	5	3	5	4	5	3	5	4	5
460	男	31	大专	未婚	4年	3	2	2	3	3	2	3	2	4	3	3	4	4	3	4	3	4	3	3	4	3	4	3	4	3	4
461	男	33	大专	未婚	5年	3	2	3	3	2	3	3	2	4	3	4	3	4	3	4	3	4	3	4	3	4	3	4	3	4	3
462	男	30	本科	未婚	3年	3	3	2	4	3	2	3	3	4	4	3	4	4	5	3	5	4	5	3	5	4	5	3	5	4	5
463	男	32	本科	已婚	5年	3	2	3	2	3	2	3	3	4	3	4	3	4	5	4	3	5	4	5	4	4	5	4	5	4	5
464	男	35	本科	已婚	7年	4	3	4	3	4	3	4	4	5	4	5	4	3	4	3	4	4	3	4	3	3	4	4	3	4	3
465	男	34	本科	已婚	6年	4	3	4	3	4	3	4	4	5	4	5	4	4	3	4	3	4	3	4	3	4	3	4	3	4	3
466	男	38	本科	已婚	9年	3	3	4	3	3	4	4	5	4	4	5	4	4	4	3	4	4	3	4	4	4	4	3	4	3	4
467	男	39	硕士	已婚	9年	3	4	3	3	4	3	4	4	4	5	4	5	4	5	4	5	4	5	4	5	4	5	4	5	4	5
468	男	37	硕士	已婚	8年	3	3	3	3	4	3	4	3	4	4	4	4	4	5	4	5	4	5	4	5	4	5	4	5	4	5
469	男	36	硕士	已婚	8年	3	3	3	3	4	3	4	3	4	4	4	4	4	5	4	5	4	5	4	5	4	5	4	5	4	5
470	男	40	本科	已婚	10年	3	3	3	4	3	3	4	4	4	3	4	3	4	4	4	4	4	4	4	4	4	4	4	4	4	4
471	男	45	本科	已婚	12年	2	3	2	3	2	3	3	3	3	4	3	4	5	4	5	4	4	5	4	5	4	5	5	4	5	4
472	男	48	大专	已婚	15年	2	2	2	3	2	2	3	2	3	2	3	2	5	3	5	3	5	3	5	3	5	3	5	3	5	3
473	男	42	本科	已婚	11年	2	3	2	2	3	2	3	3	3	3	3	3	5	4	4	5	4	4	5	4	4	5	4	4	5	4
474	男	46	高中	已婚	13年	2	2	3	2	2	3	3	2	3	2	3	2	5	3	5	3	5	3	5	3	5	3	5	3	5	3
475	男	43	本科	已婚	11年	2	3	2	3	2	3	3	3	3	4	3	4	5	4	5	4	4	5	4	5	4	5	5	4	5	4
476	男	44	本科	已婚	12年	2	3	2	3	2	3	3	3	3	4	3	4	5	4	5	4	4	5	4	5	4	5	5	4	5	4
477	男	47	高中	已婚	14年	2	2	3	2	2	3	3	2	3	2	3	2	5	3	5	3	5	3	5	3	5	3	5	3	5	3
478	男	28	本科	未婚	2年	3	2	3	2	3	2	3	2	3	3	4	3	4	4	5	4	5	4	5	4	5	4	5	4	5	4
479	男	26	大专	未婚	1年	4	3	4	4	3	4	5	4	5	4	5	4	3	3	4	3	3	4	3	3	3	3	4	3	3	4
480	男	25	大专	未婚	1年	4	4	3	5	4	3	5	4	5	5	4	5	3	3	4	3	3	4	3	3	3	3	3	4	3	3
481	男	24	高中	未婚	1年	4	3	4	4	3	4	5	3	5	4	5	4	2	4	3	2	3	4	2	3	2	3	4	2	3	2
482	男	25	本科	未婚	1年	4	3	4	5	3	4	5	3	5	4	5	3	3	4	3	3	4	3	3	4	3	3	4	3	3	4
483	男	27	本科	未婚	2年	2	2	3	2	3	2	3	2	3	3	4	3	4	4	5	4	5	4	5	4	5	4	5	5	4	5
484	男	29	本科	未婚	2年	3	2	3	4	2	3	4	3	4	4	3	4	4	5	4	3	5	4	3	5	4	5	4	3	5	4
485	男	30	本科	未婚	3年	3	3	2	4	3	2	3	3	4	4	3	4	4	5	3	5	4	5	3	5	4	5	3	5	4	5
486	男	31	大专	未婚	4年	3	2	2	3	3	2	3	2	4	3	3	4	4	3	4	3	4	3	3	4	3	4	3	4	3	4
487	男	33	大专	未婚	5年	3	2	3	3	2	3	3	2	4	3	4	3	4	3	4	3	4	3	4	3	4	3	4	3	4	3
488	男	30	本科	未婚	3年	3	3	2	4	3	2	3	3	4	4	3	4	4	5	3	5	4	5	3	5	4	5	3	5	4	5
489	男	32	本科	已婚	5年	3	2	3	2	3	2	3	3	4	3	4	3	4	5	4	3	5	4	5	4	4	5	4	5	4	5
490	男	35	本科	已婚	7年	4	3	4	3	4	3	4	4	5	4	5	4	3	4	3	4	4	3	4	3	3	4	4	3	4	3
491	男	34	本科	已婚	6年	4	3	4	3	4	3	4	4	5	4	5	4	4	3	4	3	4	3	4	3	4	3	4	3	4	3
492	男	38	本科	已婚	9年	3	3	4	3	3	4	4	5	4	4	5	4	4	4	3	4	4	3	4	4	4	4	3	4	3	4
493	男	39	硕士	已婚	9年	3	4	3	3	4	3	4	4	4	5	4	5	4	5	4	5	4	5	4	5	4	5	4	5	4	5
494	男	37	硕士	已婚	8年	3	3	3	3	4	3	4	3	4	4	4	4	4	5	4	5	4	5	4	5	4	5	4	5	4	5
495	男	36	硕士	已婚	8年	3	3	3	3	4	3	4	3	4	4	4	4	4	5	4	5	4	5	4	5	4	5	4	5	4	5
496	男	40	本科	已婚	10年	3	3	3	4	3	3	4	4	4	3	4	3	4	4	4	4	4	4	4	4	4	4	4	4	4	4
497	女	52	本科	已婚	18年	2	2	3	2	3	2	3	2	3	2	3	2	5	3	4	5	3	4	5	3	4	5	3	4	5	3
498	女	55	大专	已婚	20年	2	3	2	3	2	3	3	2	3	2	3	2	4	4	5	4	4	5	4	4	5	4	4	5	4	4
499	女	50	本科	已婚	15年	3	2	3	2	3	2	3	3	3	2	3	3	4	5	4	5	4	5	4	5	4	5	4	5	4	5
500	女	53	高中	已婚	16年	2	3	2	2	3	2	3	2	3	3	2	3	5	3	5	3	5	3	5	3	5	3	5	3	5	3
501	女	23	本科	未婚	1年	4	3	4	4	3	4	5	4	5	4	5	4	3	3	4	3	3	4	3	3	3	3	4	3	3	4
502	女	22	大专	未婚	1年	4	4	3	5	4	3	5	4	5	5	4	5	3	3	4	3	3	4	3	3	3	3	3	4	3	3
503	女	21	高中	未婚	1年	4	3	4	4	3	4	5	3	5	4	5	4	2	4	3	2	3	4	2	3	2	3	4	2	3	2
504	女	49	本科	已婚	14年	3	3	3	4	3	3	4	4	4	3	4	3	4	4	4	4	4	4	4	4	4	4	4	4	4	4
505	女	44	本科	已婚	12年	2	3	2	3	2	3	3	3	3	4	3	4	5	4	5	4	4	5	4	5	4	5	5	4	5	4
506	女	41	大专	已婚	10年	3	2	3	2	3	2	3	2	3	3	4	3	4	4	5	4	5	4	5	4	5	4	5	4	5	4
507	女	46	高中	已婚	13年	2	2	3	2	2	3	3	2	3	2	3	2	5	3	5	3	5	3	5	3	5	3	5	3	5	3
508	女	47	本科	已婚	14年	2	3	2	3	2	3	3	3	3	4	3	4	5	4	5	4	4	5	4	5	4	5	5	4	5	4
509	女	48	大专	已婚	15年	2	2	2	3	2	2	3	2	3	2	3	2	5	3	5	3	5	3	5	3	5	3	5	3	5	3
510	女	20	本科	未婚	1年	4	3	4	5	3	4	5	3	5	4	5	3	3	4	3	3	4	3	3	4	3	3	4	3	3	4
511	女	23	本科	未婚	2年	3	2	3	4	2	3	4	3	4	4	3	4	4	5	4	3	5	4	3	5	4	5	4	3	5	4
512	女	24	大专	未婚	2年	3	3	2	4	3	2	4	3	4	5	4	4	4	3	4	5	3	4	3	4	4	3	5	4	3	4
513	女	25	本科	未婚	2年	4	3	4	3	4	3	4	4	5	4	5	4	3	4	3	4	4	3	4	3	3	4	4	3	4	3
514	女	26	大专	未婚	3年	3	4	3	4	3	3	4	4	4	5	4	5	3	4	3	3	4	3	4	3	3	4	3	4	3	3
515	女	27	本科	未婚	3年	2	2	3	2	3	2	3	2	3	3	4	3	4	4	5	4	5	4	5	4	5	4	5	5	4	5
516	女	28	大专	未婚	3年	3	3	3	4	3	3	4	3	4	4	4	4	3	4	3	4	3	4	3	4	3	4	3	4	3	4
517	女	29	本科	未婚	4年	3	2	3	2	3	2	3	3	4	3	4	3	4	5	4	3	5	4	5	4	4	5	4	5	4	5
518	女	30	大专	未婚	4年	4	3	4	3	4	3	4	4	5	4	5	4	4	3	4	3	4	3	4	3	4	3	4	3	4	3
519	女	31	本科	未婚	5年	3	3	2	4	3	2	3	3	4	4	3	4	4	5	3	5	4	5	3	5	4	5	3	5	4	5
520	女	32	大专	未婚	5年	3	4	3	3	4	3	4	4	4	5	3	5	4	3	4	3	4	3	4	3	4	3	4	3	4	3
521	女	33	本科	未婚	6年	2	3	2	3	2	3	3	3	3	4	3	4	5	4	5	4	4	5	4	5	4	5	5	4	5	4
522	女	34	大专	未婚	6年	4	3	4	4	3	4	5	4	5	4	5	4	3	3	4	3	3	4	3	3	3	3	4	3	3	4
523	女	35	本科	未婚	7年	3	3	3	4	3	3	4	3	4	4	4	4	3	4	3	4	3	4	3	4	3	4	3	4	3	4
524	女	36	大专	未婚	7年	3	4	3	4	3	3	4	4	4	5	4	5	3	4	3	3	4	3	4	3	3	4	3	4	3	3
525	女	37	本科	未婚	8年	2	2	3	2	3	2	3	2	3	3	4	3	4	4	5	4	5	4	5	4	5	4	5	5	4	5
526	女	38	大专	未婚	8年	4	3	4	3	4	3	4	4	5	4	5	4	3	4	3	4	4	3	4	3	3	4	4	3	4	3
527	女	39	本科	未婚	9年	3	3	4	3	3	4	4	5	4	4	5	4	4	4	3	4	4	3	4	4	4	4	3	4	3	4
528	女	40	大专	未婚	10年	3	4	3	3	4	3	4	4	4	5	4	5	4	5	4	5	4	5	4	5	4	5	4	5	4	5
529	女	41	本科	未婚	10年	2	3	2	2	3	2	3	3	3	3	3	3	5	4	4	5	4	4	5	4	4	5	4	4	5	4
530	女	42	大专	未婚	11年	4	3	4	4	3	4	5	4	5	4	5	4	3	3	4	3	3	4	3	3	3	3	4	3	3	4
531	女	43	本科	未婚	11年	3	3	3	4	3	3	4	3	4	4	4	4	3	4	3	4	3	4	3	4	3	4	3	4	3	4
532	女	44	大专	未婚	12年	3	4	3	4	3	3	4	4	4	5	4	5	3	4	3	3	4	3	4	3	3	4	3	4	3	3
533	女	45	本科	未婚	12年	2	2	3	2	3	2	3	2	3	3	4	3	4	4	5	4	5	4	5	4	5	4	5	5	4	5
534	女	46	大专	未婚	13年	4	3	4	3	4	3	4	4	5	4	5	4	3	4	3	4	4	3	4	3	3	4	4	3	4	3
535	女	47	本科	未婚	13年	3	3	4	3	3	4	4	5	4	4	5	4	4	4	3	4	4	3	4	4	4	4	3	4	3	4
536	女	48	大专	未婚	14年	3	4	3	3	4	3	4	4	4	5	4	5	4	5	4	5	4	5	4	5	4	5	4	5	4	5
537	女	49	本科	未婚	14年	2	3	2	3	2	3	3	3	3	4	3	4	5	4	5	4	4	5	4	5	4	5	5	4	5	4
538	女	50	大专	未婚	15年	4	3	4	4	3	4	5	4	5	4	5	4	3	3	4	3	3	4	3	3	3	3	4	3	3	4
539	女	51	本科	未婚	15年	3	3	3	4	3	3	4	3	4	4	4	4	3	4	3	4	3	4	3	4	3	4	3	4	3	4
540	女	52	大专	未婚	16年	3	4	3	4	3	3	4	4	4	5	4	5	3	4	3	3	4	3	4	3	3	4	3	4	3	3
541	男	51	本科	已婚	16年	2	2	3	2	3	2	3	2	3	3	4	3	4	4	5	4	5	4	5	4	5	4	5	5	4	5
542	男	53	大专	已婚	17年	4	3	4	3	4	3	4	4	5	4	5	4	3	4	3	4	4	3	4	3	3	4	4	3	4	3
543	男	55	本科	已婚	18年	3	3	4	3	3	4	4	5	4	4	5	4	4	4	3	4	4	3	4	4	4	4	3	4	3	4
544	男	52	高中	已婚	17年	3	4	3	3	4	3	4	4	4	5	4	5	4	5	4	5	4	5	4	5	4	5	4	5	4	5
545	男	54	本科	已婚	19年	2	3	2	3	2	3	3	3	3	4	3	4	5	4	5	4	4	5	4	5	4	5	5	4	5	4
546	女	23	硕士	未婚	2年	4	3	4	4	3	4	5	4	5	4	5	4	3	3	4	3	3	4	3	3	3	3	4	3	3	4
547	女	29	硕士	未婚	3年	3	3	3	4	3	3	4	3	4	4	4	4	3	4	3	4	3	4	3	4	3	4	3	4	3	4
548	女	35	硕士	已婚	6年	3	4	3	4	3	3	4	4	4	5	4	5	3	4	3	3	4	3	4	3	3	4	3	4	3	3
549	女	40	硕士	已婚	9年	2	2	3	2	3	2	3	2	3	3	4	3	4	4	5	4	5	4	5	4	5	4	5	5	4	5
550	女	45	硕士	已婚	12年	4	3	4	3	4	3	4	4	5	4	5	4	3	4	3	4	4	3	4	3	3	4	4	3	4	3
551	男	28	硕士	未婚	3年	3	3	4	3	3	4	4	5	4	4	5	4	4	4	3	4	4	3	4	4	4	4	3	4	3	4
552	男	33	硕士	已婚	5年	3	4	3	3	4	3	4	4	4	5	4	5	4	5	4	5	4	5	4	5	4	5	4	5	4	5
553	男	39	硕士	已婚	8年	2	3	2	3	2	3	3	3	3	4	3	4	5	4	5	4	4	5	4	5	4	5	5	4	5	4
554	男	44	硕士	已婚	11年	4	3	4	4	3	4	5	4	5	4	5	4	3	3	4	3	3	4	3	3	3	3	4	3	3	4
555	男	49	硕士	已婚	14年	3	3	3	4	3	3	4	3	4	4	4	4	3	4	3	4	3	4	3	4	3	4	3	4	3	4
556	男	54	硕士	已婚	19年	3	4	3	4	3	3	4	4	4	5	4	5	3	4	3	3	4	3	4	3	3	4	3	4	3	3
557	男	50	硕士	已婚	15年	2	2	3	2	3	2	3	2	3	3	4	3	4	4	5	4	5	4	5	4	5	4	5	5	4	5
