# Supplementary material
Source: Research Square preprint supplement (doi:10.21203/rs.3.rs-9653463/v1)
Supplement: Supplementary file 1 [file fd7e97d6d417019fc8490b6c.docx]

**导游职业污名、工作家庭冲突压力、职业嵌入度与离职倾向调查问卷**

尊敬的导游从业者：

您好！本次问卷旨在研究导游职业污名、工作家庭冲突压力、职业嵌入度与离职倾向之间的关系。问卷采用匿名方式填写，所有数据仅用于学术研究，严格保密个人信息。问卷填写约需 5 分钟，恳请您根据实际情况如实作答，感谢您的支持与配合！

**一、基本信息**（请在对应选项上打 “√”）

1. 性别：

□ 男  □ 女

1. 年龄：

□ 18–30 岁  □ 31–40 岁  □ 41–50 岁  □ 51 岁及以上

1. 学历：

□ 高中及以下  □ 大专  □ 本科  □ 硕士及以上

1. 婚姻状况：

□ 已婚  □ 未婚

1. 从业年限：

□ 3 年以下  □ 3–5 年  □ 6–10 年  □ 10 年以上

**二、主体问卷**（请根据您的实际感受打分）

计分说明：1＝非常不同意；2＝不同意；3＝一般；4＝同意；5＝非常同意

**（一）职业污名感知**

1. 公众普遍对导游职业存在负面刻板印象。   □1 □2 □3 □4 □5
2. 社会大众认为导游职业是不体面、不光彩的职业。   □1 □2 □3 □4 □5
3. 身边亲友会因我从事导游工作而产生偏见。   □1 □2 □3 □4 □5
4. 媒体报道常将导游塑造成负面、不道德的形象。   □1 □2 □3 □4 □5
5. 导游职业在社会上的认可度和口碑较差。   □1 □2 □3 □4 □5
6. 从事导游工作会让我感受到他人的歧视眼光。   □1 □2 □3 □4 □5

**（二）工作家庭冲突压力**

1. 导游工作的特殊性让我难以平衡工作与家庭生活，产生较大压力。

□1 □2 □3 □4 □5

1. 工作中的负面情绪（如职业污名带来的压力）会影响我的家庭关系，造成困扰。

   □1 □2 □3 □4 □5

**（三）离职倾向**

1. 我经常有离开导游行业的想法。   □1 □2 □3 □4 □5
2. 近期我正在考虑寻找其他行业的工作机会。   □1 □2 □3 □4 □5
3. 若有合适的其他工作，我会果断放弃导游职业。   □1 □2 □3 □4 □5
4. 我对继续从事导游工作缺乏长期坚持的意愿。    □1 □2 □3 □4 □5

**（四）职业嵌入度**

**职业联结**

1. 我在导游行业积累了较多同行人脉和职业资源。   □1 □2 □3 □4 □5
2. 我与导游行业的同事、合作伙伴关系紧密，互动频繁。  □1 □2 □3 □4 □5
3. 我参与了较多导游行业相关的社群、协会或组织。   □1 □2 □3 □4 □5
4. 我的社交圈很大程度围绕导游职业展开。   □1 □2 □3 □4 □5

**职业匹配**

1. 导游职业的工作内容与我的个人能力、兴趣高度契合。  □1 □2 □3 □4 □5
2. 导游职业的发展前景符合我的职业规划。   □1 □2 □3 □4 □5
3. 我认同导游职业的价值，觉得这份工作有意义。   □1 □2 □3 □4 □5
4. 我的性格和特质很适合从事导游工作。   □1 □2 □3 □4 □5
5. 我能在导游工作中获得成就感和自我满足感。   □1 □2 □3 □4 □5

**职业牺牲**

1. 离开导游行业，我会损失大量积累的职业经验和技能。  □1 □2 □3 □4 □5
2. 放弃导游工作，我会失去现有的行业资源和人脉。   □1 □2 □3 □4 □5
3. 转行做其他工作，我需要付出很高的时间、精力成本。  □1 □2 □3 □4 □5
4. 离开导游行业，我难以找到同等价值或待遇的工作。   □1 □2 □3 □4 □5
5. 转行会让我之前在导游行业的投入付诸东流。   □1 □2 □3 □4 □5

感谢您的填写！
